# Supplementary material for: DIVA metabolomics: Differentiating vaccination status following viral challenge using metabolomic profiles
Source: PubMed Central journal article supplement (PMC5886402; doi:10.1371/journal.pone.0194488), 2018-04-05
Supplement: pone.0194488.s006.pdf [file pone.0194488.s006.pdf]

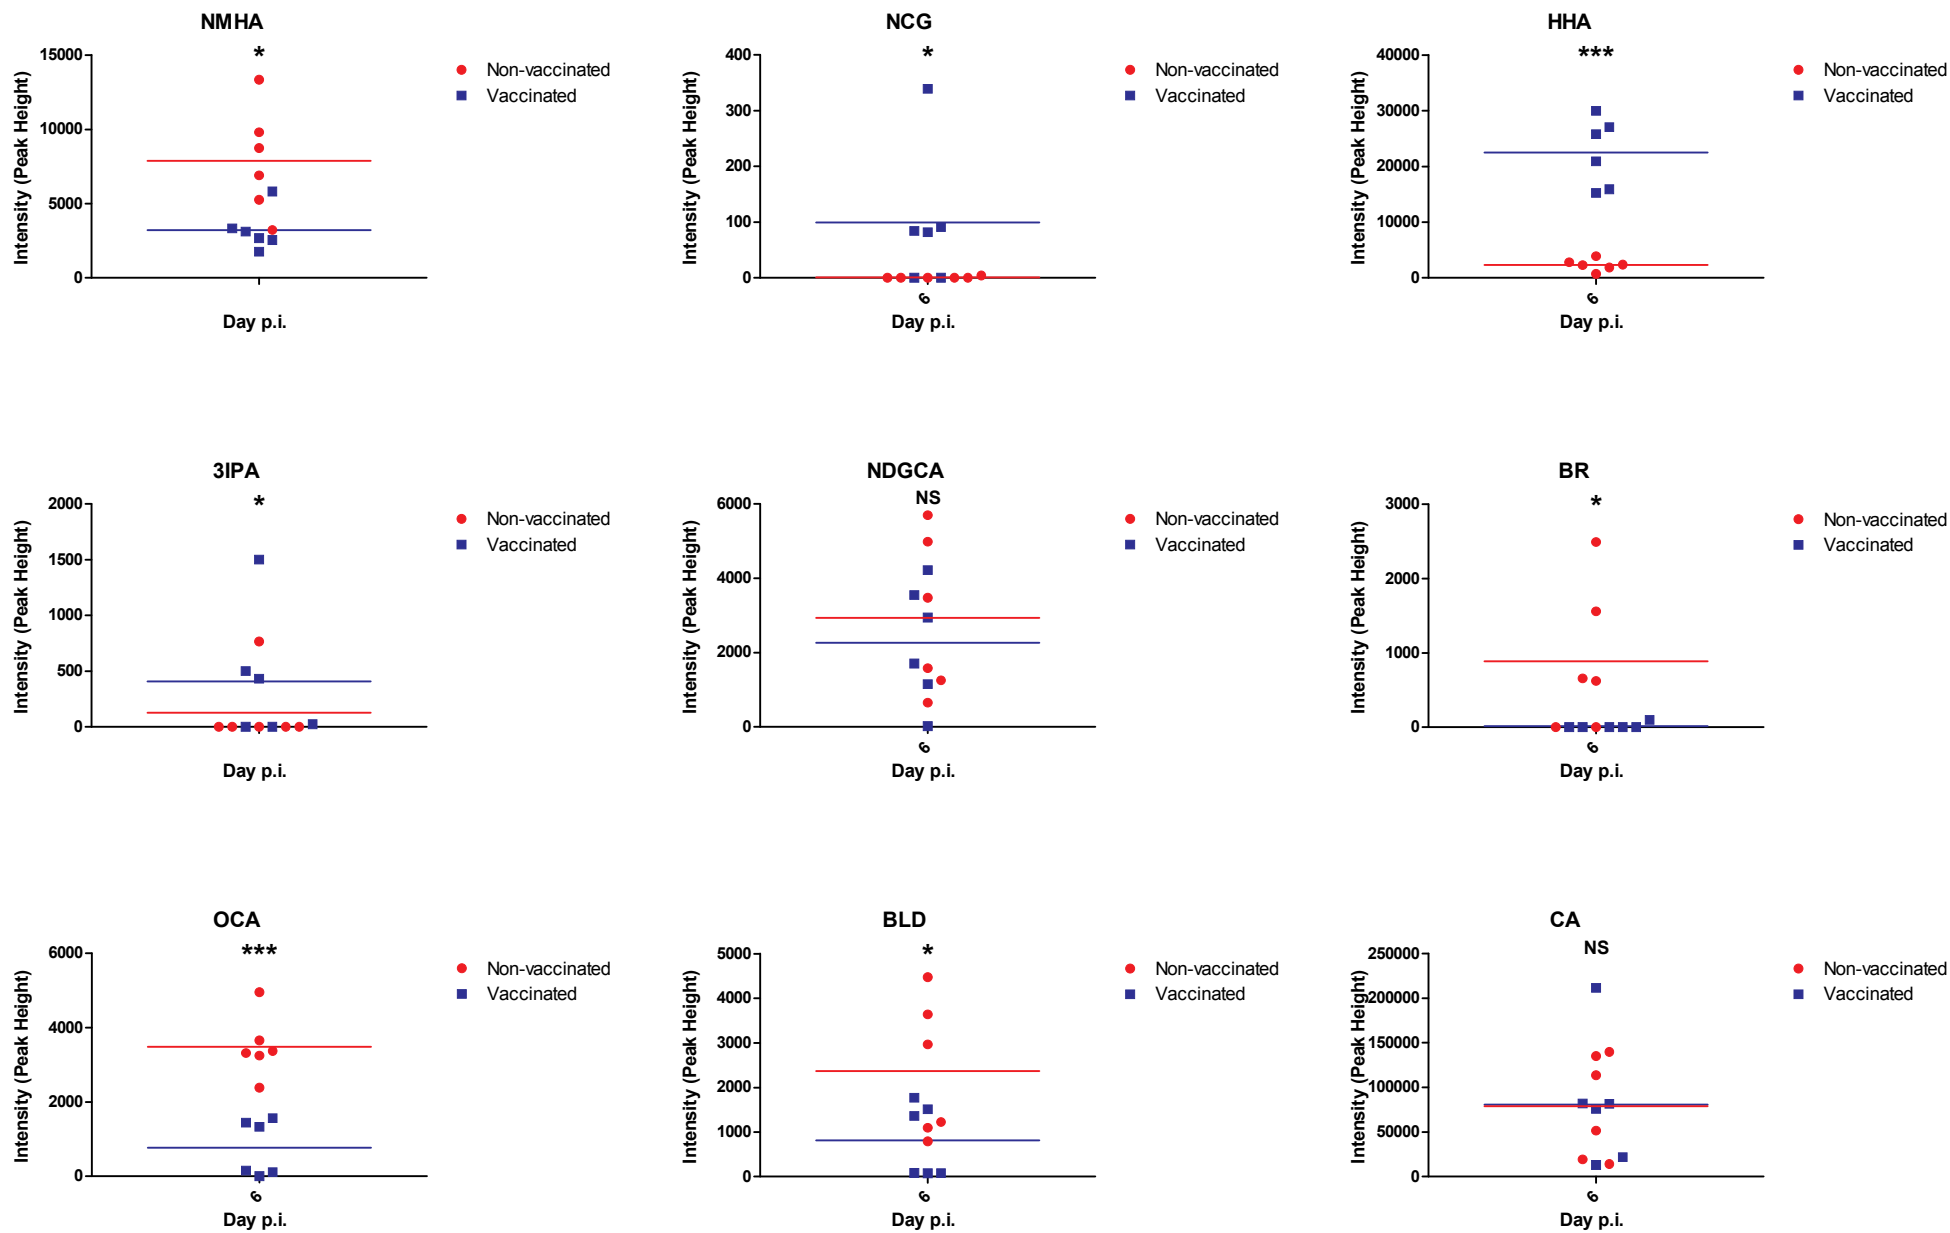

**Figure 2. Peak intensity of identified metabolites in individual animals from analysis run 1 (day 6 p.i.).** Significant changes in metabolite peak intensity (height) are indicated NS =  $p > 0.05$ , \* =  $p < 0.05$ , \*\* =  $p < 0.01$ , \*\*\* =  $p < 0.001$ .

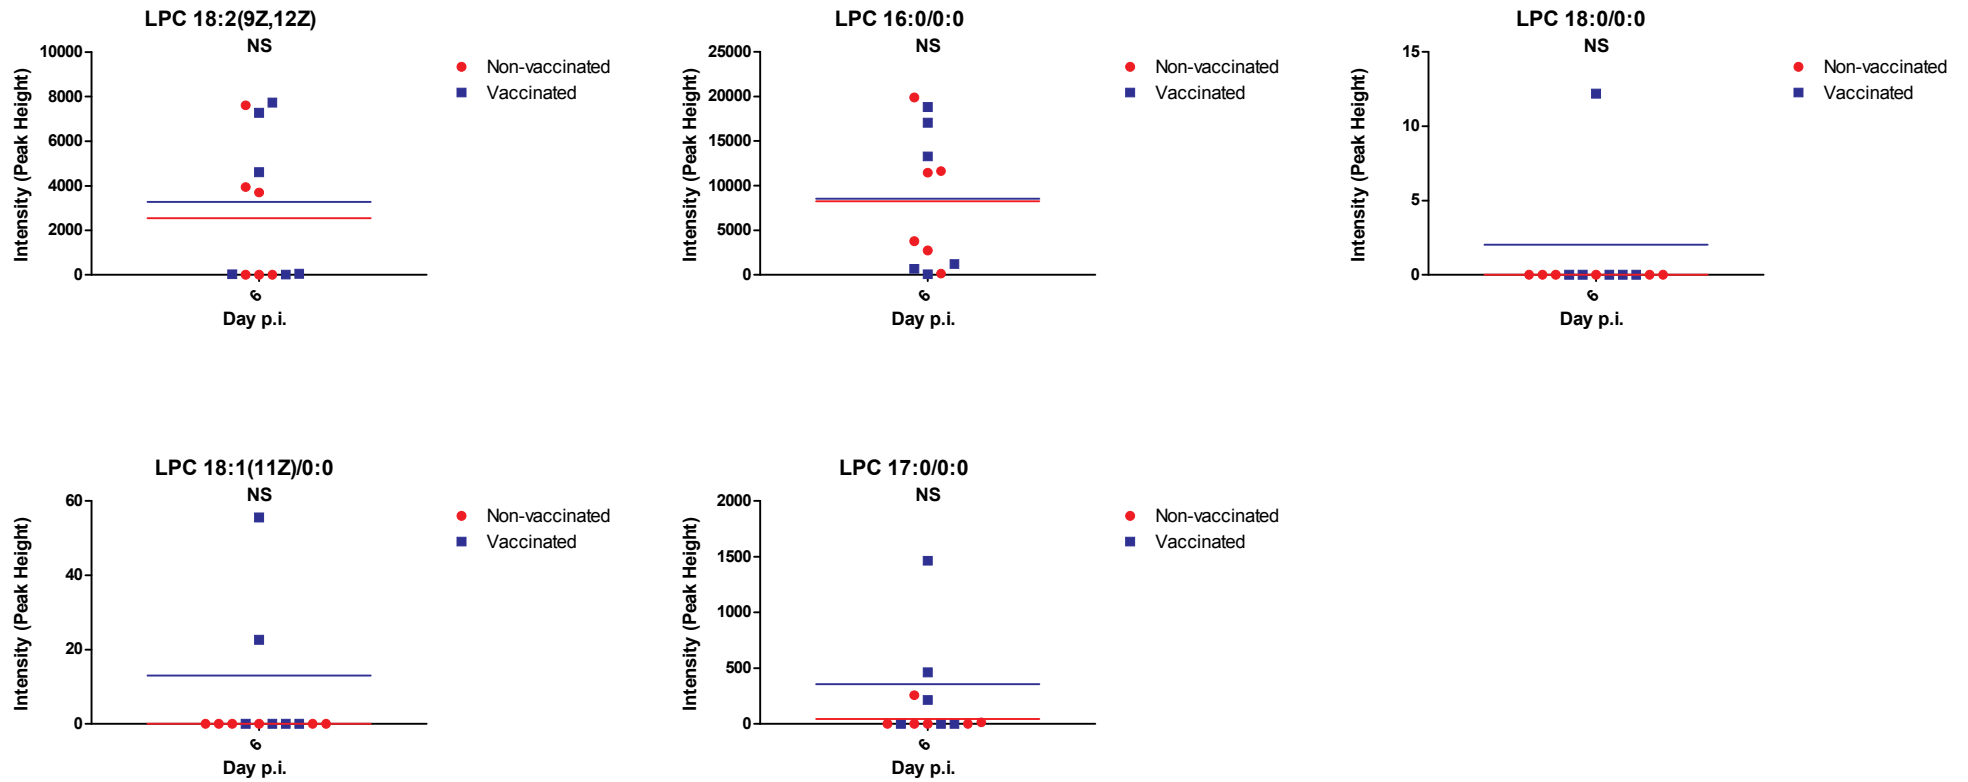

**Figure 2. Peak intensity of identified metabolites in individual animals from analysis run 1 (day 6 p.i.).** Significant changes in metabolite peak intensity (height) are indicated NS =  $p > 0.05$ , \* =  $p < 0.05$ , \*\* =  $p < 0.01$ , \*\*\* =  $p < 0.001$ .

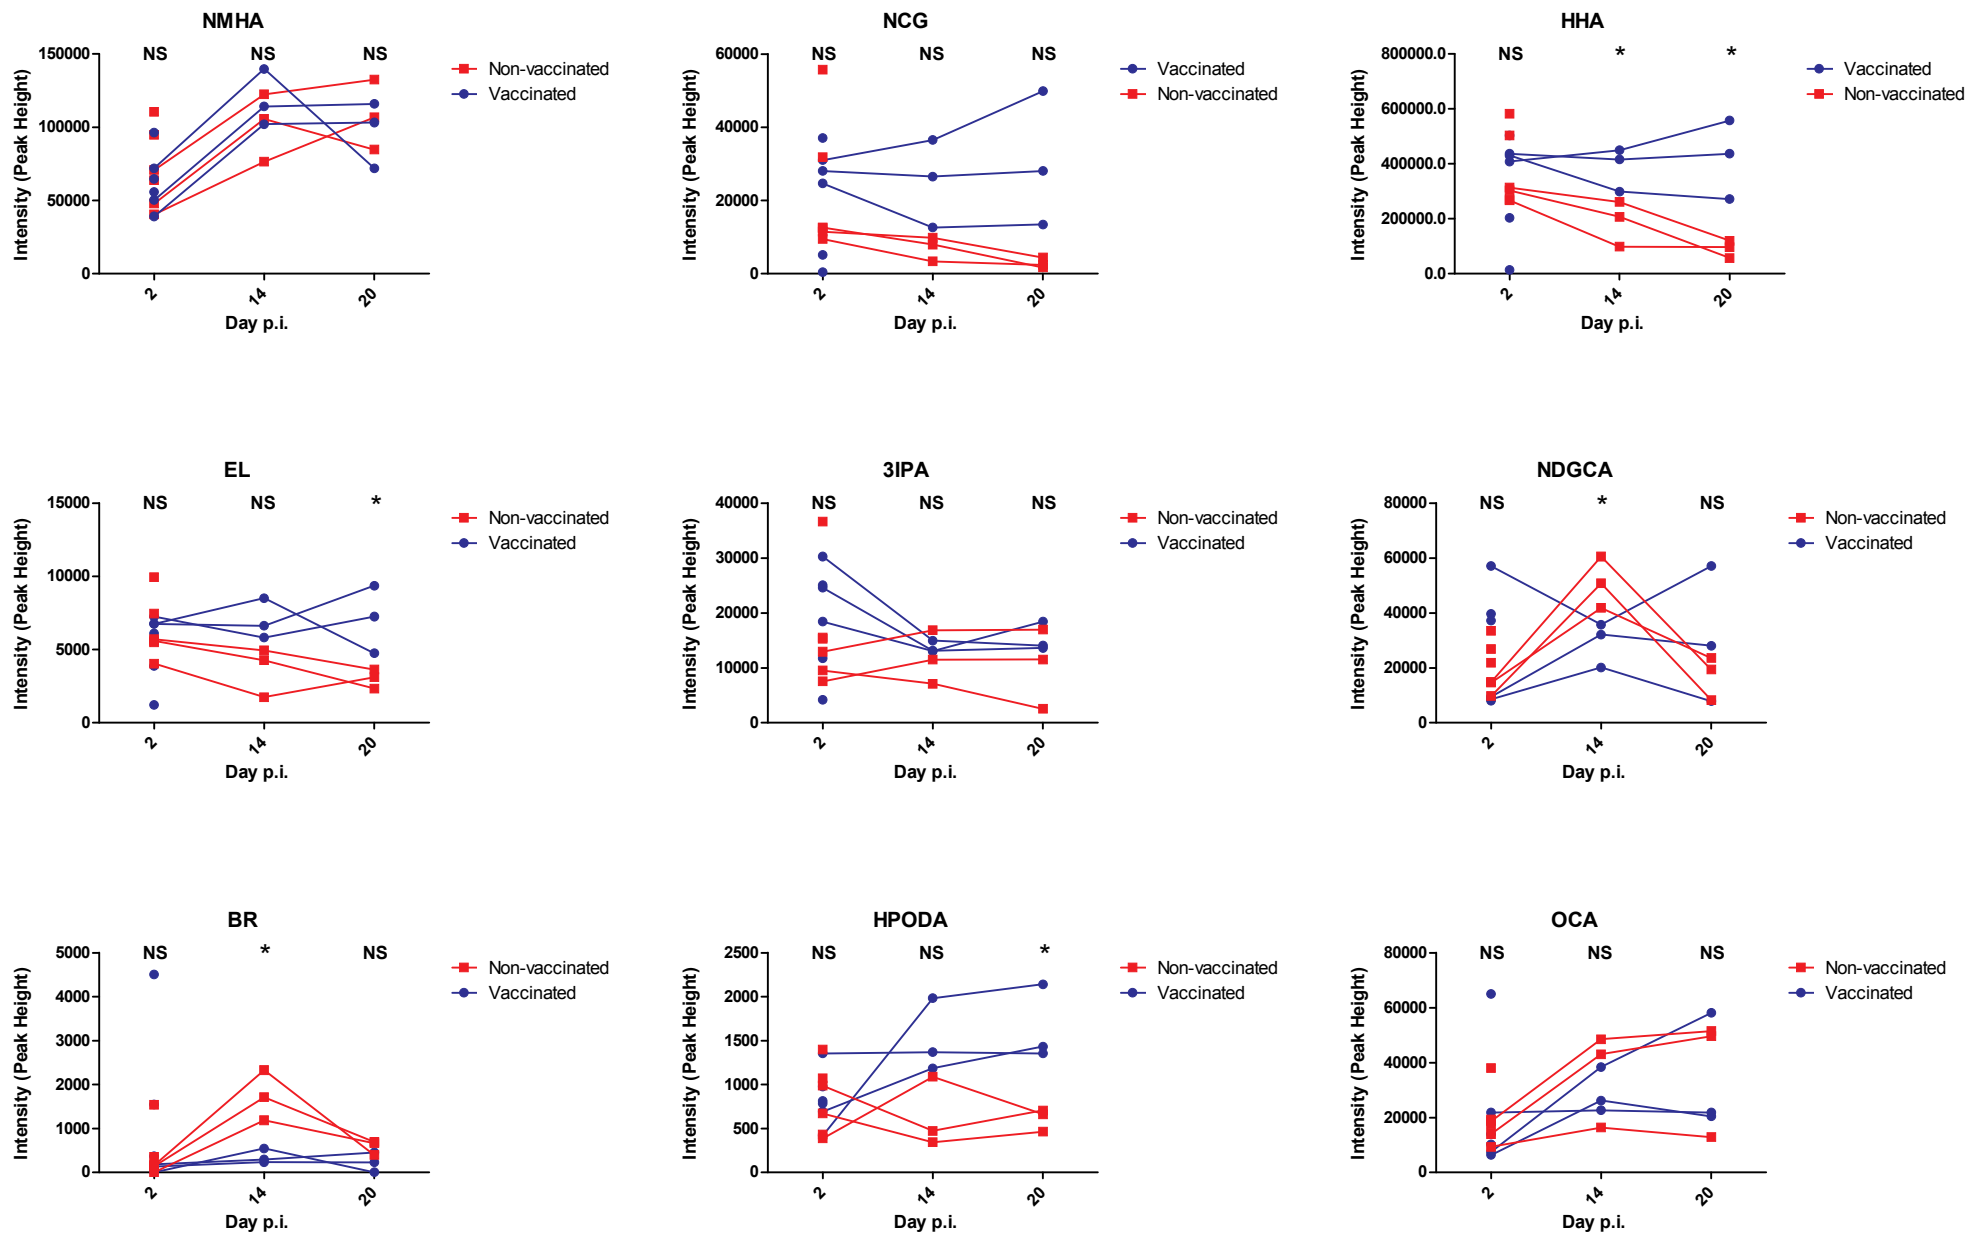

**Figure 2. Peak intensity of identified metabolites in individual animals from analysis run 2 (days 2, 14 and 20 p.i.).** Significant changes in metabolite peak intensity (height) are indicated NS =  $p > 0.05$ , \* =  $p < 0.05$ , \*\* =  $p < 0.01$ , \*\*\* =  $p < 0.001$ . Peak intensity for individual animals is connect across sampling days.

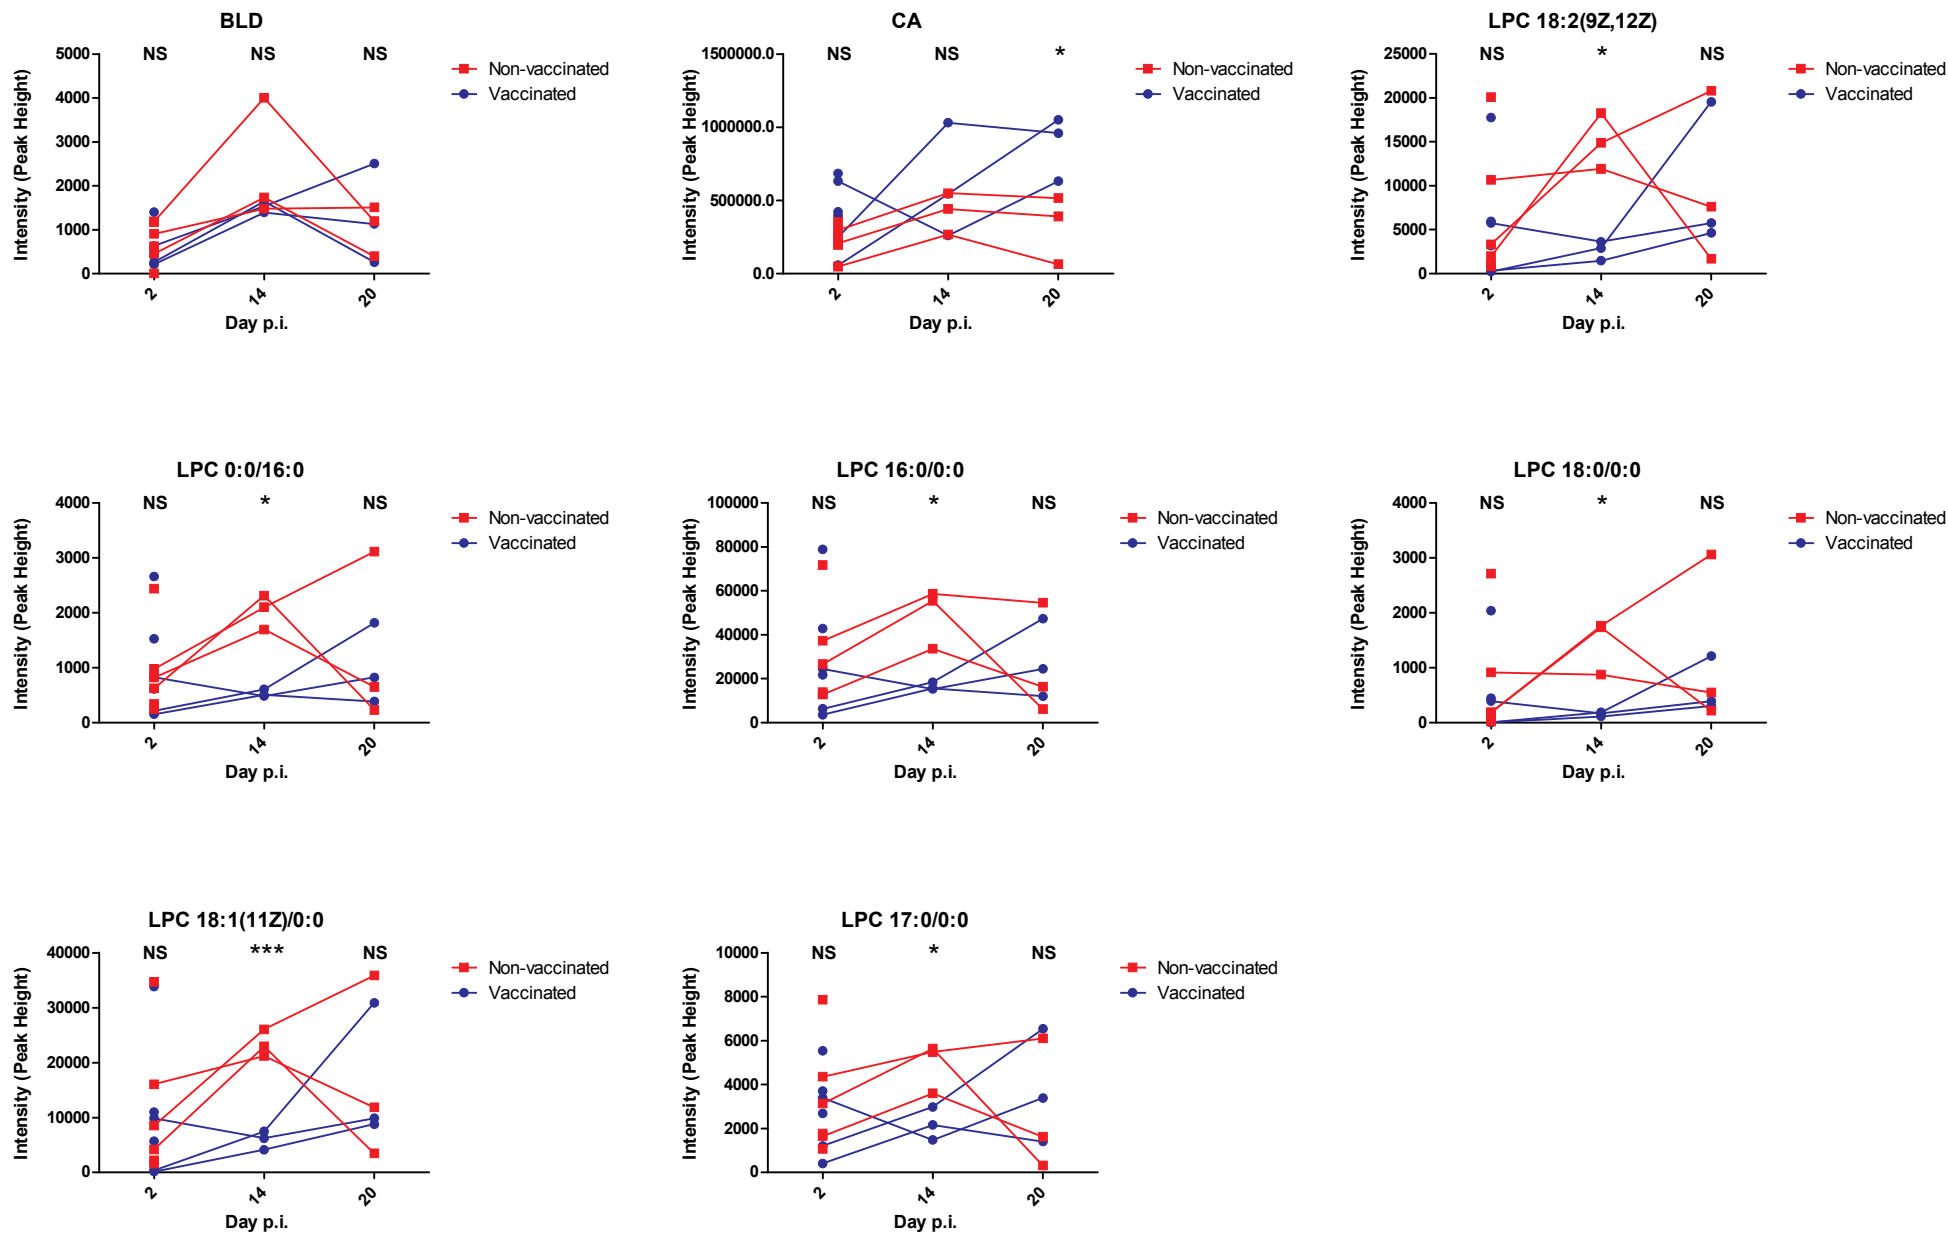

**Figure 2. Peak intensity of identified metabolites in individual animals from analysis run 2 (days 2, 14 and 20 p.i.).** Significant changes in metabolite peak intensity (height) are indicated NS =  $p > 0.05$ , \* =  $p < 0.05$ , \*\* =  $p < 0.01$ , \*\*\* =  $p < 0.001$ . Peak intensity for individual animals is connect across sampling days.
