# Supplementary material for: DIVA metabolomics: Differentiating vaccination status following viral challenge using metabolomic profiles
Source: PubMed Central journal article supplement (PMC5886402; doi:10.1371/journal.pone.0194488), 2018-04-05
Supplement: pone.0194488.s008.pdf [file pone.0194488.s008.pdf]

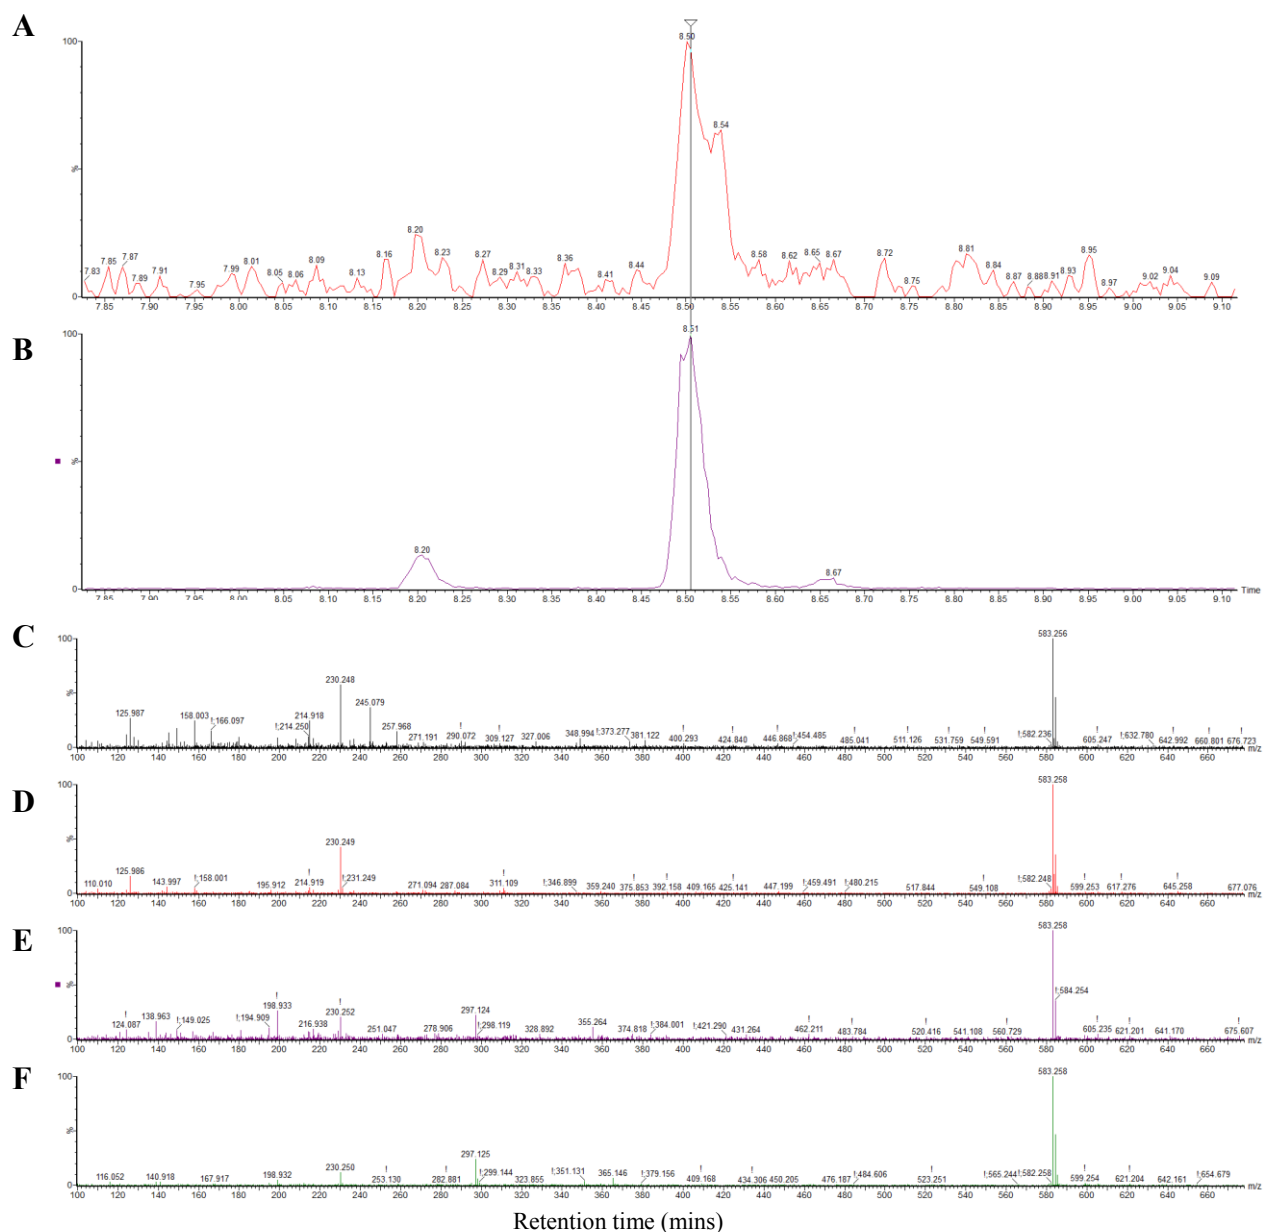

**Figure 4A: Identification of Bilverdin (BLD) in plasma using Waters Xevo G2 Qtof.** (A) Chromatographic peak of compound with mass/z 583.258 in plasma. (B) Chromatographic peak of 1M of BLD standard prepared in 0.1% formic acid, 99.9% acetonitrile. (C) Function 1 (low energy) fragmentation spectra of compound with mass/z 583.258 in plasma. (D) Function 1 (low energy) fragmentation spectra of BLD standard prepared in 0.1% formic acid, 99.9% acetonitrile. (E) Function 2 (high energy ramp) fragmentation spectra of compound with mass/z 583.258 in plasma. (F) Function 2 (high energy ramp) fragmentation spectra of BLD standard prepared in 0.1% formic acid, 99.9% acetonitrile.

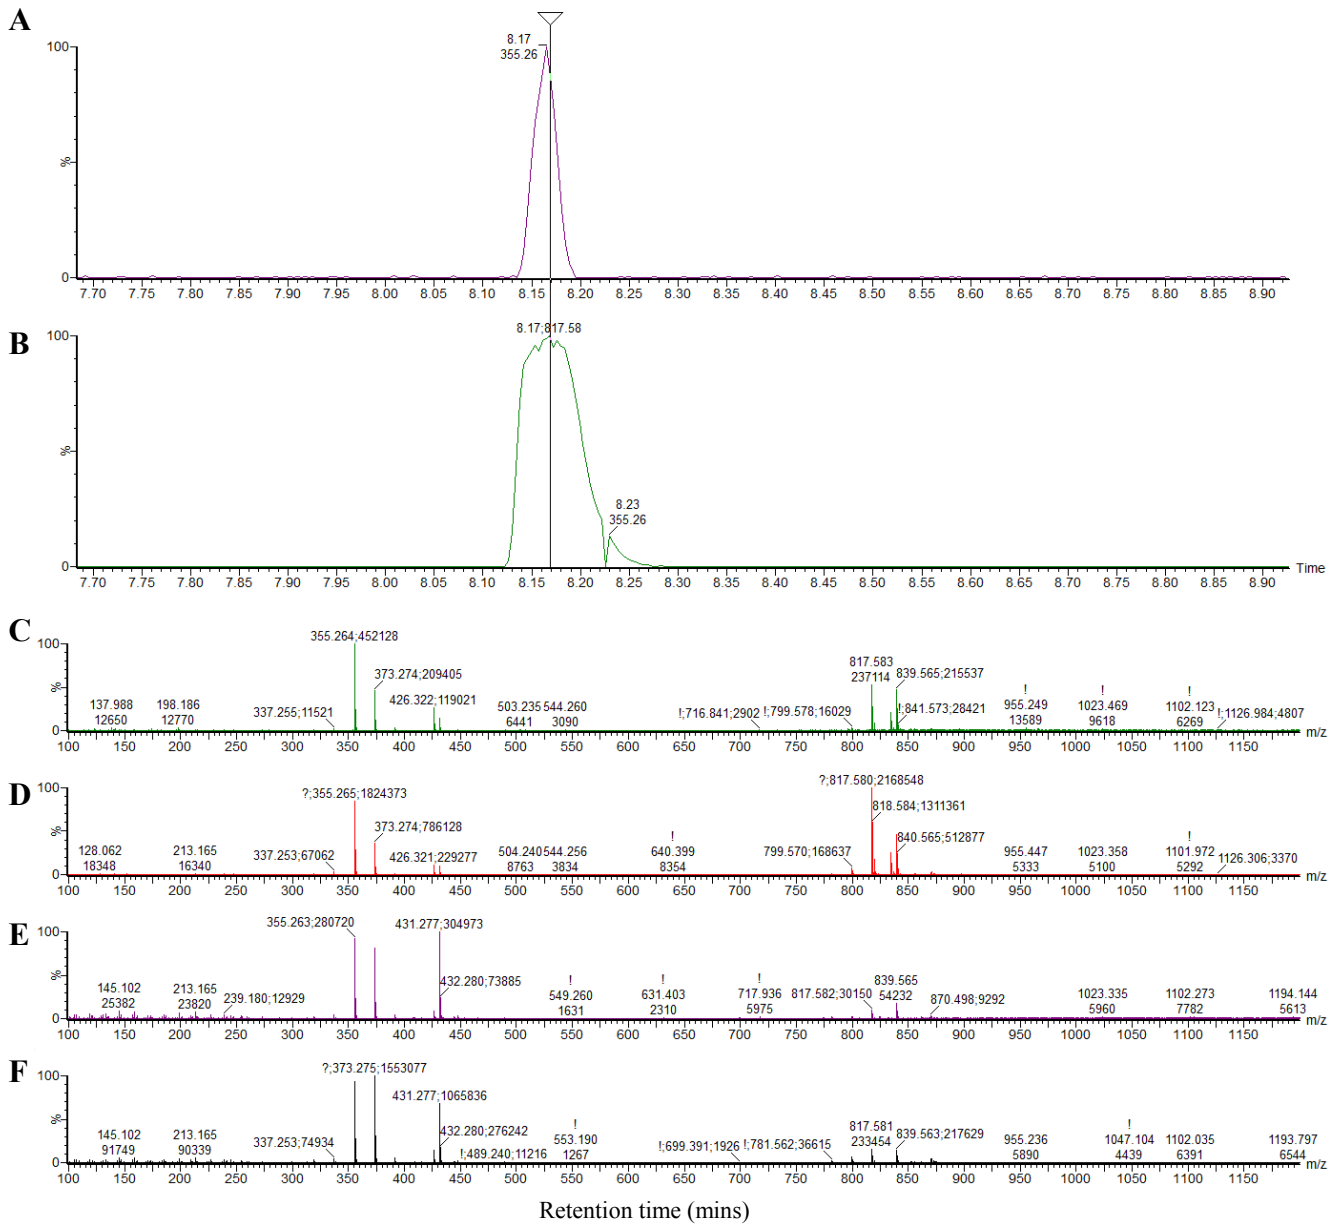

**Figure 4B: Identification of Cholic Acid (CA) in plasma using Waters Xevo G2 Qtof.** (A) Chromatographic peak of compound with mass/z 817.583 in plasma. (B) Chromatographic peak of 1M of CA standard prepared in methanol. (C) Function 1 (low energy) fragmentation spectra of compound with mass/z 817.583 in plasma. (D) Function 1 (low energy) fragmentation spectra of CA standard prepared in methanol. (E) Function 2 (high energy ramp) fragmentation spectra of compound with mass/z 817.583 in plasma. (F) Function 2 (high energy ramp) fragmentation spectra of CA standard prepared in methanol.

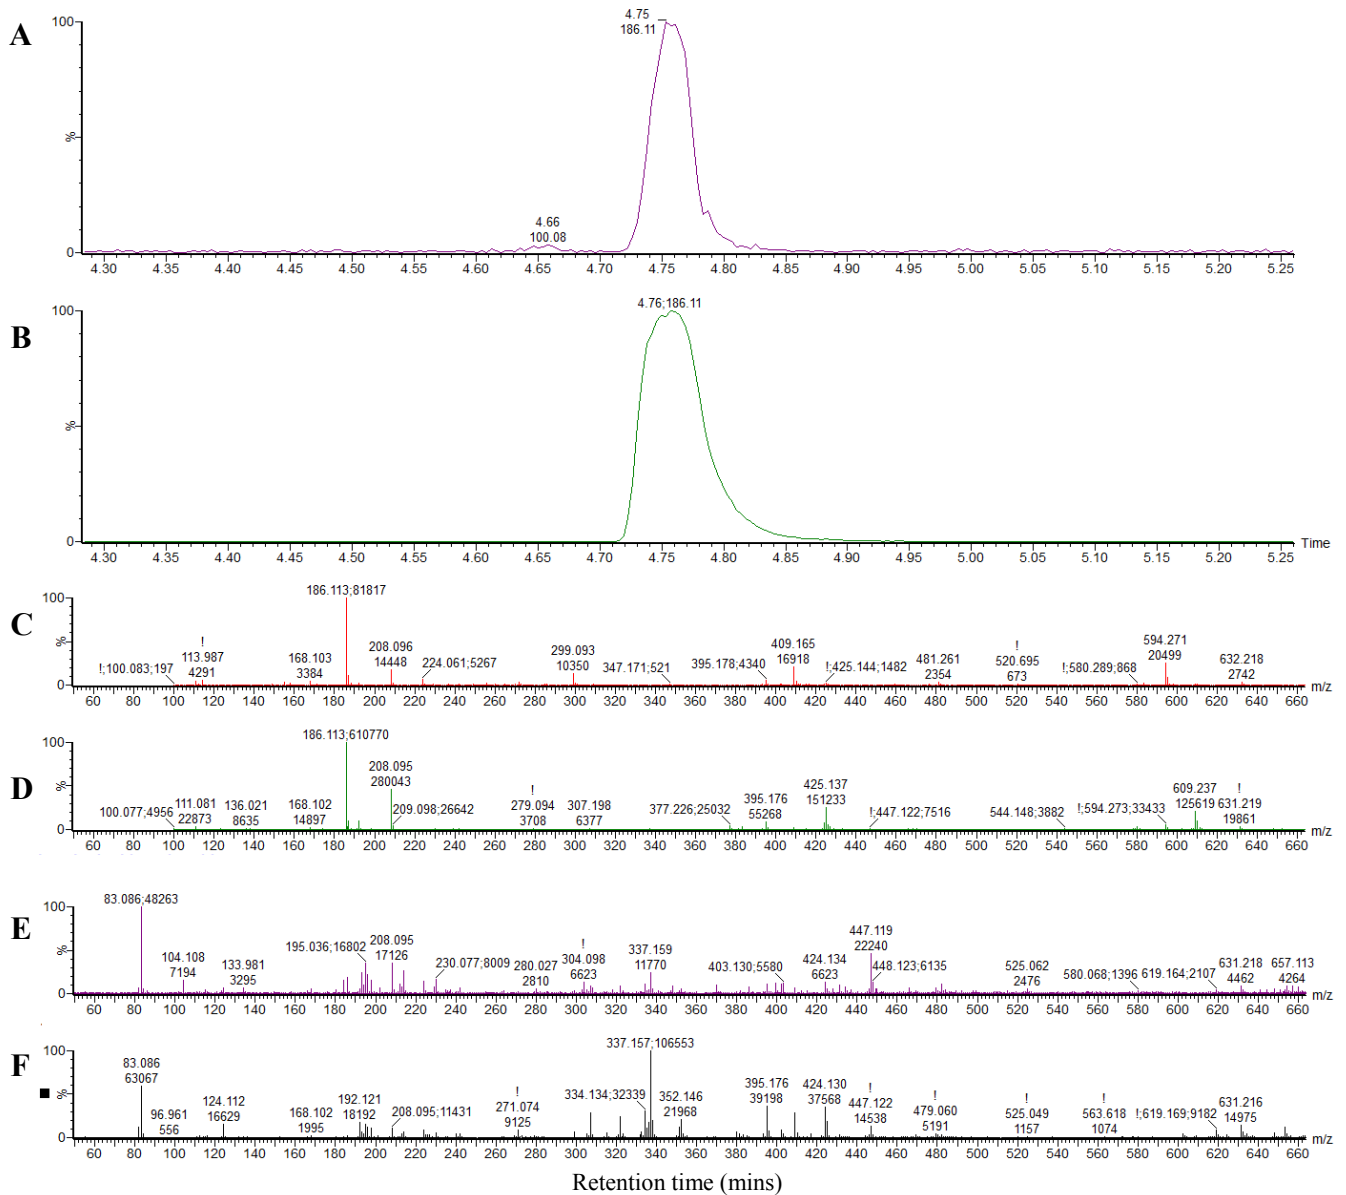

**Figure 4C: Identification of Hexahydrohippuric Acid (HHA) in plasma using Waters Xevo G2 Qtof.** (A) Chromatographic peak of compound with mass/z 186.113 in plasma. (B) Chromatographic peak of 1M of HHA standard prepared in methanol. (C) Function 1 (low energy) fragmentation spectra of compound with mass/z 186.113 in plasma. (D) Function 1 (low energy) fragmentation spectra of HHA standard prepared in methanol. (E) Function 2 (high energy ramp) fragmentation spectra of compound with mass/z 186.113 in plasma. (F) Function 2 (high energy ramp) fragmentation spectra of HHA standard prepared in methanol.

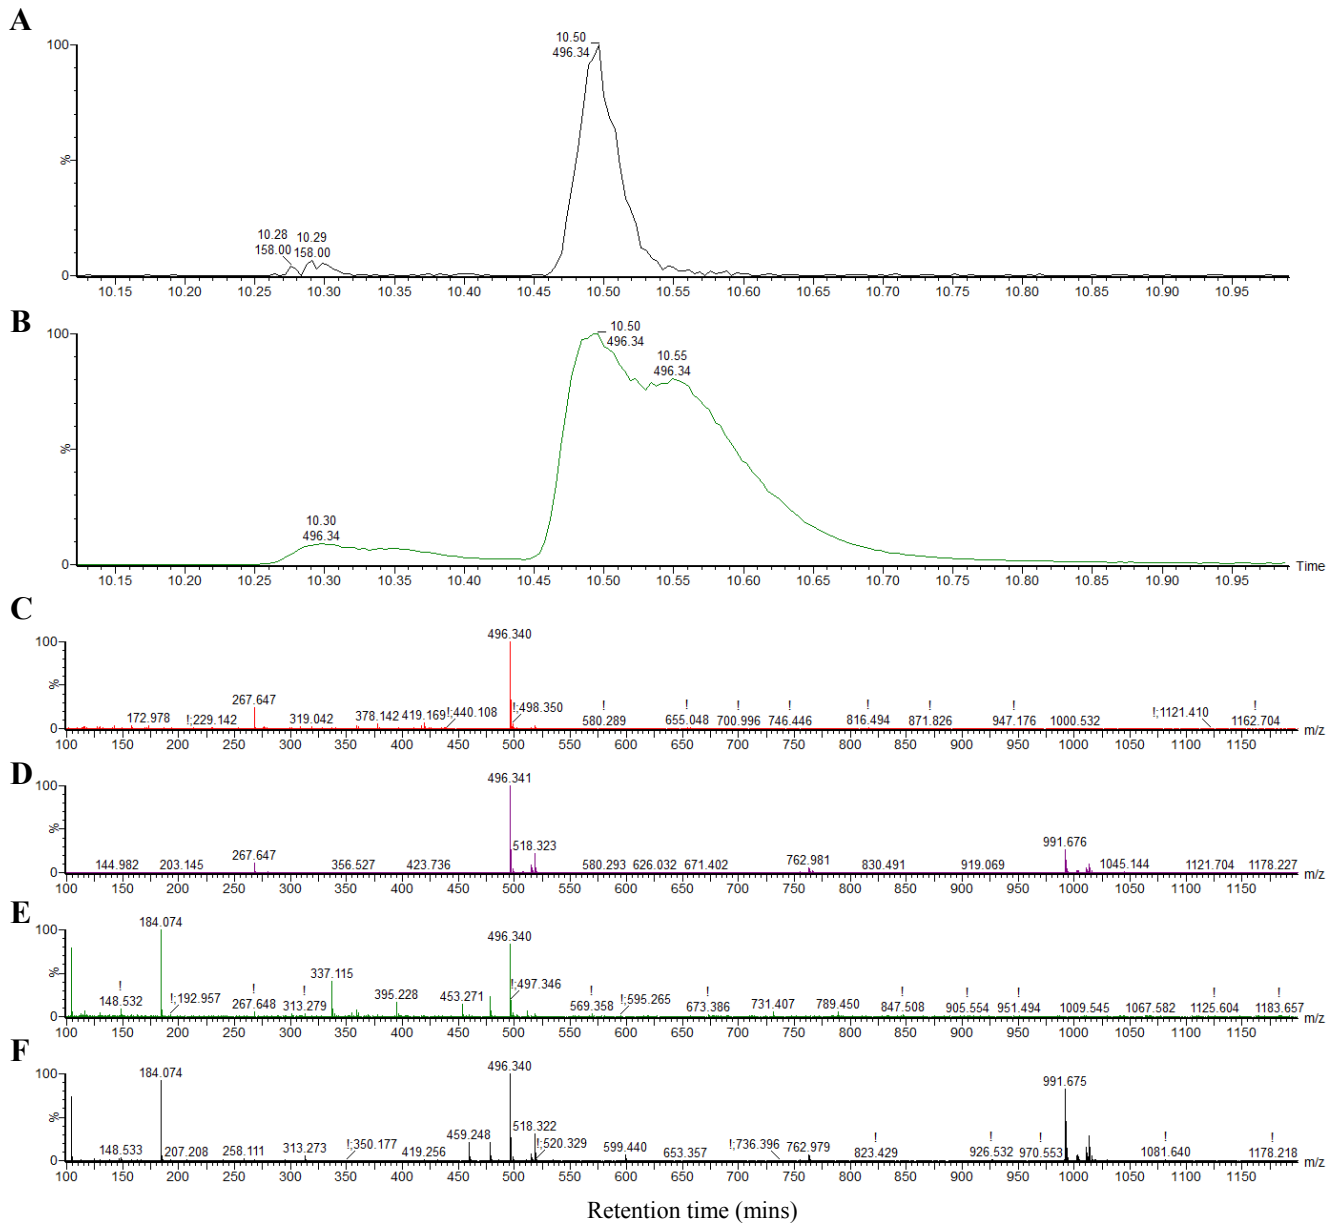

**Figure 4D: Identification Lysophosphatidylcholine (LPC) in plasma using Waters Xevo G2 Qtof.** (A) Chromatographic peak of compound with mass/z 496.340 in plasma. (B) Chromatographic peak of 1M of LPC standard prepared in methanol. (C) Function 1 (low energy) fragmentation spectra of compound with mass/z 496.340 in plasma. (D) Function 1 (low energy) fragmentation spectra of LPC standard prepared in methanol. (E) Function 2 (high energy ramp) fragmentation spectra of compound with mass/z 496.340 in plasma. (F) Function 2 (high energy ramp) fragmentation spectra of LPC standard prepared in methanol.
